# Supplementary material
Source: ML conference proceedings conference paper supplement (https://openreview.net/forum?id=07MMvQPcs3)
Supplement: supplementary_material [file An.pdf › An.pdf]

Anonymized Repo:

<https://anonymous.4open.science/r/codeht-temp-F199/README.md>
